# Supplementary material for: Next-Generation Antisense Oligonucleotide of TGF-β2 Enhances T Cell-Mediated Anticancer Efficacy of Anti-PD-1 Therapy in a Humanized Mouse Model of Immune-Excluded Melanoma
Source: MDPI journal article supplement (doi:10.3390/cancers14215220), 2022-10-25
Supplement: s1 [file s1]

# Supplementary

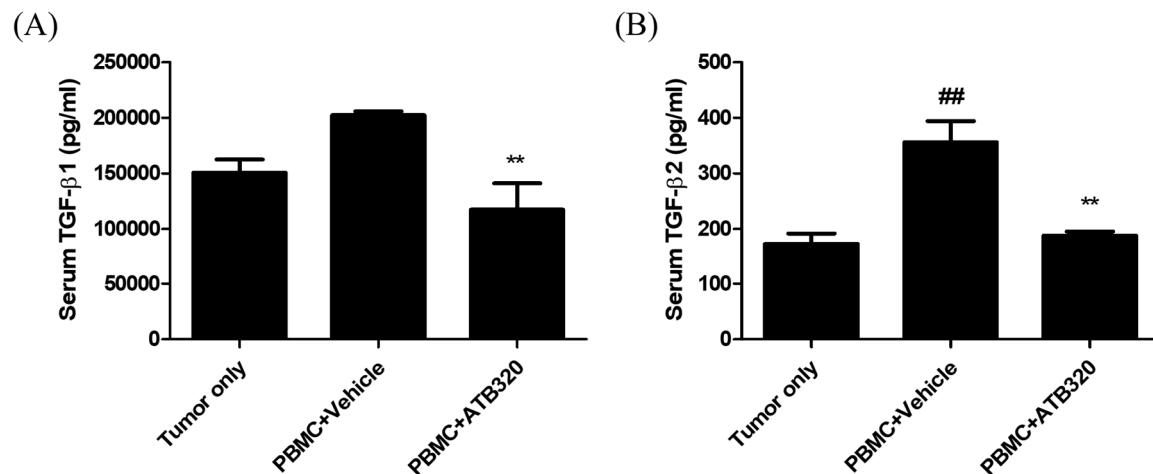

**Figure S1. Effects of ATB320 on changes in serum TGF-βs levels.** Levels of TGF-β1 and TGF-β2 in the blood serum of hu-PBL NSG-B2m mice were detected by the Luminex assay on day 23. Data showing the concentration of (A) TGF-β1 and (B) TGF-β2 in serum. The results are expressed as mean±S.E.M. obtained from six mice per group. ##  $p < 0.01$  vs. Tumor only group; \*\*  $p < 0.01$  vs. PBMC+Vehicle group (Dunnett's test).
